# Supplementary material for: Pyridoxine 5′-phosphate oxidase is correlated with human breast invasive ductal carcinoma development
Source: publisher site journal article supplement (doi:10.18632/aging.101908), 2019-04-14
Supplement: Supplementary file [file aging-v11i7-101908-supplementary-material-SD1.pdf]

**SUPPLEMENTARY FIGURE**

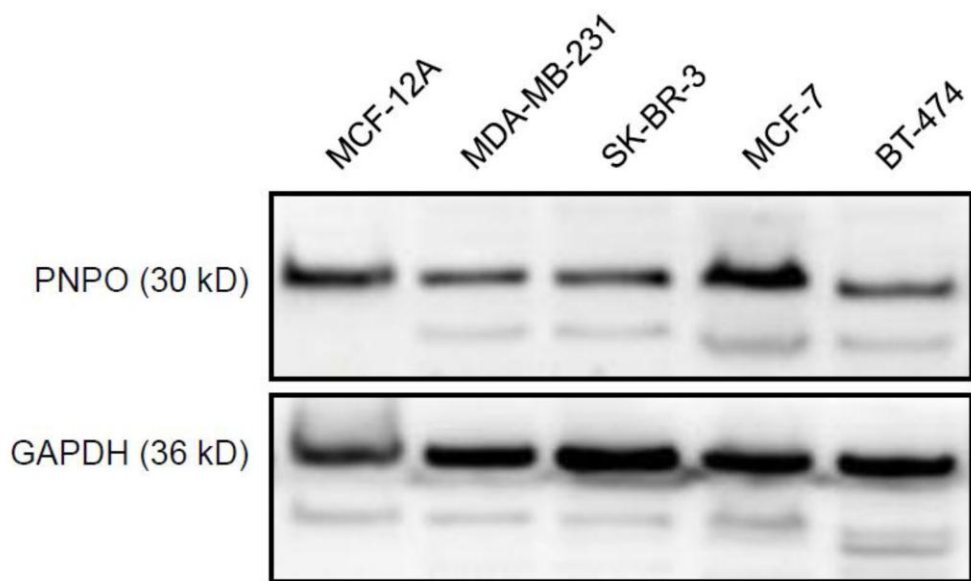

| Cell line<br>Expression | MCF-12A | MDA-<br>MB-231 | SK-BR-3 | MCF-7 | BT-474 |
|-------------------------|---------|----------------|---------|-------|--------|
| ER                      | -       | -              | -       | +     | +      |
| PR                      | -       | -              | -       | +     | +      |
| HER2                    | -       | -              | +       | -     | +      |

**Supplementary Figure 1. Human breast non-cancerous cell line (MCF-12A) and breast cancer cell lines (MDA-MB-231, SK-BR-3, MCF-7, and BT-474) were used.** MDA-MB-231 and SK-BR-3 are hormone-sensitive breast cancer cell lines; MCF-7 and BT-474 are hormone-insensitive breast cancer cell lines (BMC Genomics. 2016; 17 Suppl 7: 525). Upper panel shows the expression of PNPO protein in five breast cells detected by Western blot. Lower panel shows the expression features of five breast cells. ER, estrogen receptor; PR, progesterone receptor; HER2, human epidermal growth factor receptor-2; -, negative expression; +, positive expression.
